# Supplementary material for: Solvent-mediated preparation of a heterometallic [2 × 2] grid via a 1D metal–organic template with extraordinary acid/base-resistance
Source: Royal Society of Chemistry journal article supplement (doi:10.1039/c6ra26412c), 2017-01-01
Supplement: c6ra26412c1.pdf [file c6ra26412c1.pdf]

## Supporting Information

# **Solvent-Mediated Preparation of a Heterometallic [2×2] Grid via a 1D Metal–Organic Template with Extraordinary Acid/Base-Resistance**

Yi Han,<sup>a</sup> Hao Zheng,<sup>a</sup> Huijun Li,<sup>\*,b</sup> Hongli Wang,<sup>a</sup> Shi-Min Wang,<sup>\*,c</sup> Yanling Geng,<sup>a</sup>  
Lei Wang,<sup>\*,a</sup>

<sup>a</sup> Key Laboratory of Eco-chemical Engineering, Ministry of Education, Inorganic Synthesis and Applied Chemistry, College of Chemistry and Molecular Engineering, Qingdao University of Science and Technology, Qingdao 266042, P. R. China. E-mail: inorchemwl@126.com;

<sup>b</sup> College of Chemistry and Chemical Engineering, Henan Polytechnic University, Jiaozuo, Henan 454000, P. R. China. E-mail: lihuijunxgy@hpu.edu.cn;

<sup>c</sup> Department of Material and Chemistry Engineering, Henan Institute of Engineering, Henan 450007, P. R. China. E-mail: wsmhaue@163.com;

**Table S1.** Crystal data and structure refinement details of **1** and **2**.

|                                            | <b>1</b>                                                                                                                     | <b>2</b>                                                                                                                                                                                                              |
|--------------------------------------------|------------------------------------------------------------------------------------------------------------------------------|-----------------------------------------------------------------------------------------------------------------------------------------------------------------------------------------------------------------------|
| Formula                                    | [Fe <sup>II</sup> L(H <sub>2</sub> O)]·2H <sub>2</sub> O<br>C <sub>17</sub> H <sub>14</sub> FeN <sub>11</sub> O <sub>3</sub> | [Fe <sup>III</sup> <sub>2</sub> Na <sub>2</sub> L <sub>4</sub> (H <sub>2</sub> O) <sub>4</sub> ]·8H <sub>2</sub> O<br>C <sub>68</sub> H <sub>60</sub> Fe <sub>2</sub> N <sub>44</sub> Na <sub>2</sub> O <sub>12</sub> |
| Fw                                         | 476.24                                                                                                                       | 1858.68                                                                                                                                                                                                               |
| temp/K                                     | 298 (2)                                                                                                                      | 100(2)                                                                                                                                                                                                                |
| cryst syst                                 | monoclinic                                                                                                                   | triclinic                                                                                                                                                                                                             |
| space group                                | <i>C</i> 2                                                                                                                   | <i>P</i> -1                                                                                                                                                                                                           |
| <i>a</i> (Å)                               | 22.027(4)                                                                                                                    | 12.0542(4)                                                                                                                                                                                                            |
| <i>b</i> (Å)                               | 7.4504(15)                                                                                                                   | 12.5534(4)                                                                                                                                                                                                            |
| <i>c</i> (Å)                               | 11.654(2)                                                                                                                    | 15.4060(4)                                                                                                                                                                                                            |
| <i>α</i> (°)                               | 90                                                                                                                           | 112.178(3)                                                                                                                                                                                                            |
| <i>β</i> (°)                               | 90.19(3)                                                                                                                     | 102.023(3)                                                                                                                                                                                                            |
| <i>γ</i> (°)                               | 90                                                                                                                           | 99.933(3)                                                                                                                                                                                                             |
| <i>V</i> (Å <sup>3</sup> )                 | 1912.5(7)                                                                                                                    | 2028.63(11)                                                                                                                                                                                                           |
| <i>Z</i>                                   | 4                                                                                                                            | 1                                                                                                                                                                                                                     |
| <i>D<sub>c</sub></i> (mg·m <sup>-3</sup> ) | 1.654                                                                                                                        | 1.521                                                                                                                                                                                                                 |
| <i>μ</i> /(mm <sup>-1</sup> )              | 0.838                                                                                                                        | 3.730                                                                                                                                                                                                                 |
| <i>F</i> (000)                             | 972                                                                                                                          | 952                                                                                                                                                                                                                   |
| rflns collected                            | 3282                                                                                                                         | 8090                                                                                                                                                                                                                  |
| unique rflns                               | 3238                                                                                                                         | 6962                                                                                                                                                                                                                  |
| <i>R</i> <sub>int</sub>                    | 0.0201                                                                                                                       | 0.0436                                                                                                                                                                                                                |
| GOF on <i>F</i> <sup>2</sup>               | 1.052                                                                                                                        | 1.068                                                                                                                                                                                                                 |
| <i>R</i> <sub>1</sub> <sup>a</sup> (I>2σI) | 0.0554                                                                                                                       | 0.0940                                                                                                                                                                                                                |
| <i>wR</i> <sub>2</sub> <sup>a</sup>        | 0.1595                                                                                                                       | 0.2748                                                                                                                                                                                                                |

$${}^aR_1 = \frac{\sum ||F_o| - |F_c||}{\sum |F_o|}, \quad {}^aR_2 = \frac{[\sum (|F_o|^2 - |F_c|^2)^2 / \sum |F_o|^2]^2}{\sum |F_o|^2}]^{1/2}.$$

**Table S2.** Selected bonds distances (Å) and angles (°) in **1** and **2**.

| <b>1</b>          |            |                     |            |
|-------------------|------------|---------------------|------------|
| Fe(1)-N(1)        | 2.145(4)   | Fe(1)-N(2)          | 2.170(4)   |
| Fe(1)-N(7)        | 2.240(4)   | Fe(2)-O(1)          | 2.011(6)   |
| Fe(2)-N(9)        | 2.185(4)   | Fe(2)-N(10)         | 2.274(5)   |
| N(1)-Fe(1)-N(2)   | 74.72(16)  | N(1)#1-Fe(1)-N(2)   | 104.85(16) |
| N(1)-Fe(1)-N(7)#1 | 106.41(16) | N(2)#1-Fe(1)-N(7)#1 | 148.68(16) |
| N(2)-Fe(1)-N(7)#1 | 84.29(17)  |                     |            |
| <b>2</b>          |            |                     |            |
| Fe(1)-N(1)        | 1.926(4)   | Fe(1)-N(2)          | 1.942(4)   |
| Fe(1)-N(7)        | 1.937(4)   | Fe(1)-N(12)         | 1.924(4)   |
| Fe(1)-N(13)       | 1.941(4)   | Fe(1)-N(18)         | 1.925(4)   |
| N(12)-Fe(1)-N(18) | 80.61(16)  | N(12)-Fe(1)-N(1)    | 177.89(18) |
| N(18)-Fe(1)-N(1)  | 98.83(17)  | N(12)-Fe(1)-N(7)    | 101.50(17) |
| N(18)-Fe(1)-N(7)  | 91.49(18)  | N(1)-Fe(1)-N(7)     | 80.54(17)  |
| N(12)-Fe(1)-N(13) | 80.76(16)  | N(18)-Fe(1)-N(13)   | 161.24(17) |
| N(1)-Fe(1)-N(13)  | 99.87(16)  | N(7)-Fe(1)-N(13)    | 90.12(18)  |
| N(12)-Fe(1)-N(2)  | 97.33(17)  | N(18)-Fe(1)-N(2)    | 91.28(17)  |
| N(1)-Fe(1)-N(2)   | 80.64(18)  | N(7)-Fe(1)-N(2)     | 161.17(17) |
| N(13)-Fe(1)-N(2)  | 93.20(18)  |                     |            |

Symmetry codes #1: -x+1,y,-z    #2 -x+1,y,-z+1

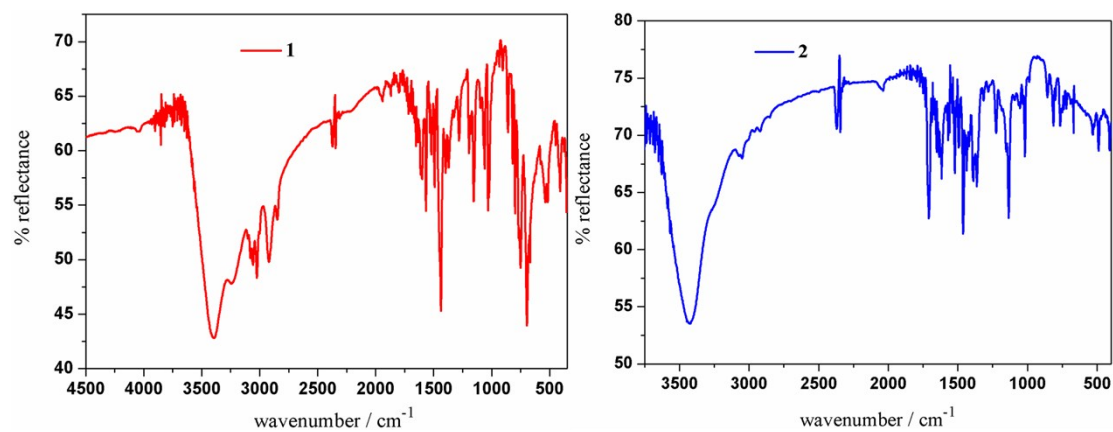

**Figure S1.** FT-IR of **1** and **2**.

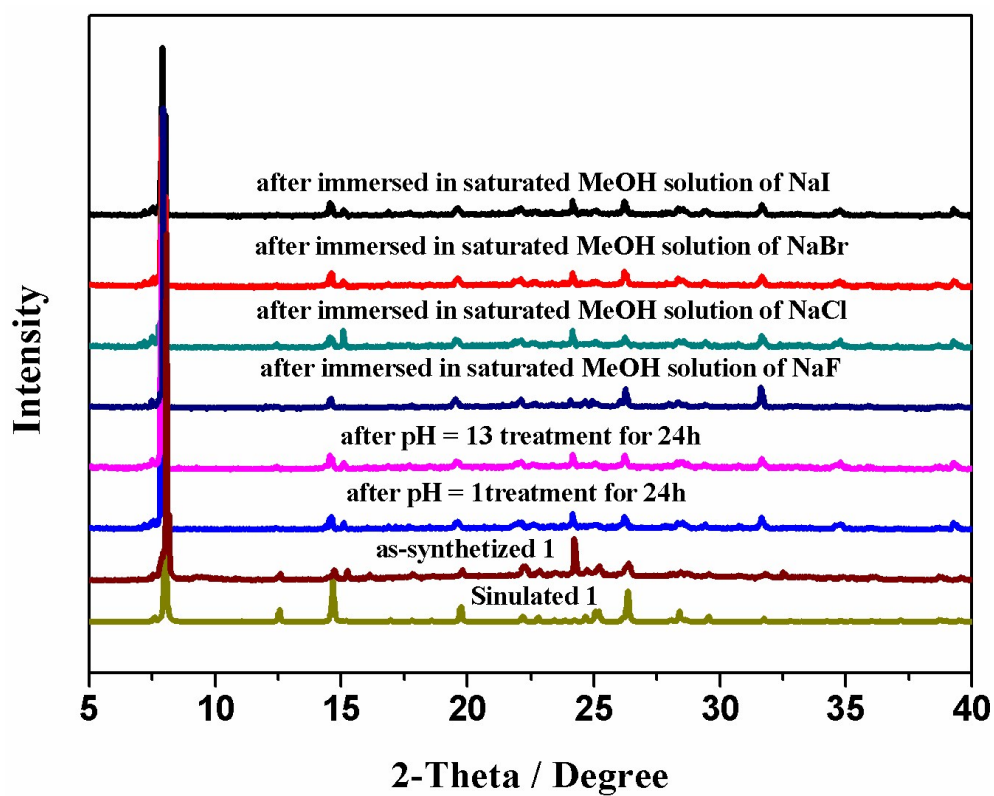

**Figure S2.** PXRD patterns of **1** after immersion in aqueous solutions with different pH values and NaX (X = F, Cl, Br and I).

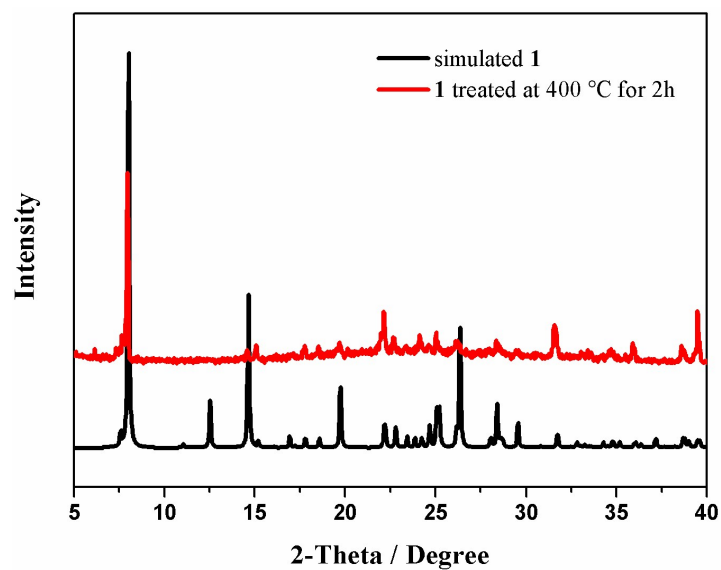

Figure S3. PXRD of 1 treated at 400 °C for 2h.

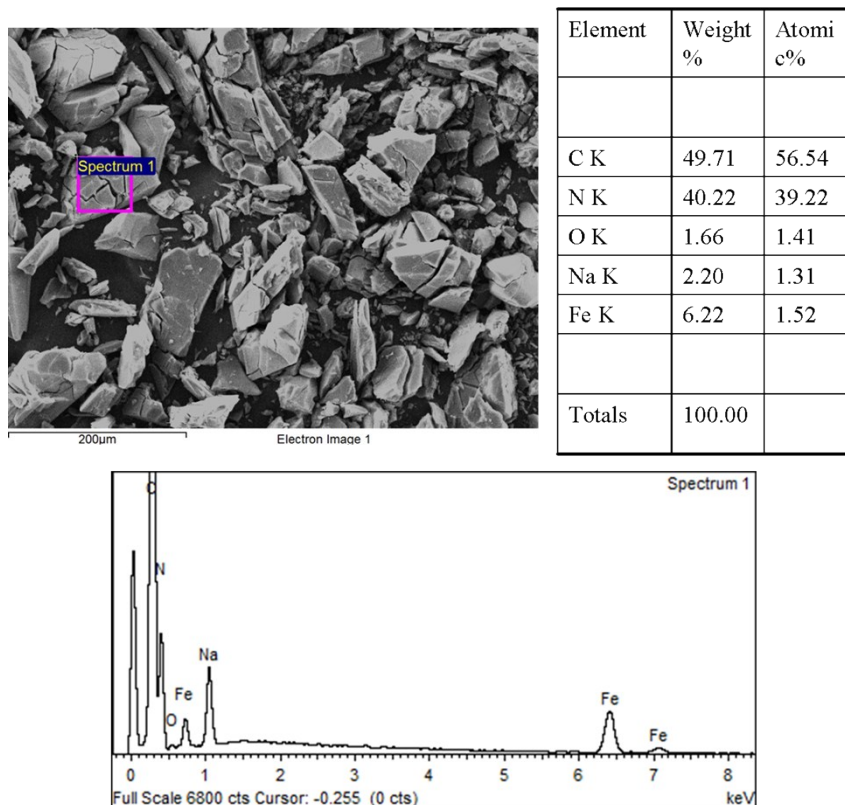

Figure S4. Typical SEM image of products from 2 (EDS was listed on the bottom of SEM images).

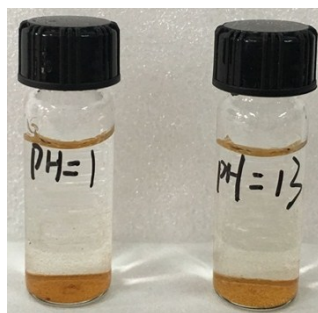

**Figure S5.** Freshly as-prepared crystals of **1** were respectively soaked in aqueous solutions with pH = 1 and 13 at room temperature.

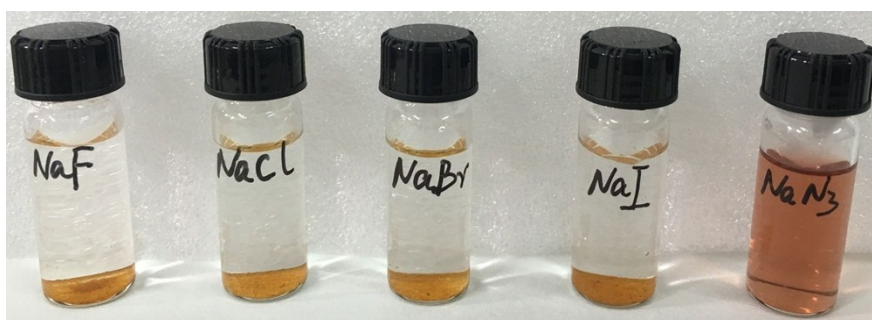

**Figure S6.** Freshly as-prepared crystals of **1** were respectively immersed in saturated MeOH solutions of NaF, NaCl, NaBr, NaI, and NaN<sub>3</sub> at room temperature.

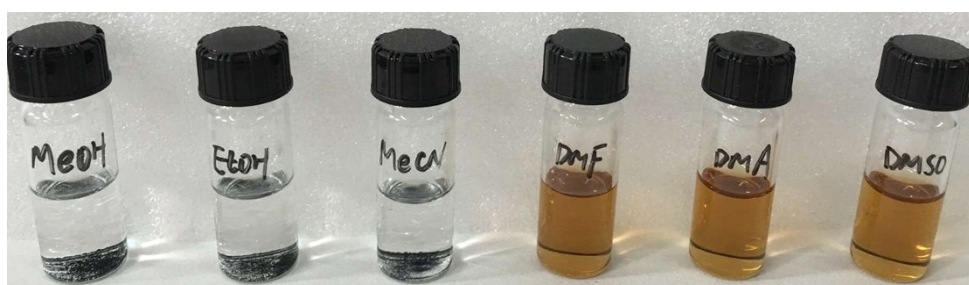

**Figure S7.** Freshly as-prepared crystals of **2** can be insoluble in MeOH, EtOH, MeCN, but readily dissolve in DMF, DMA and DMSO.

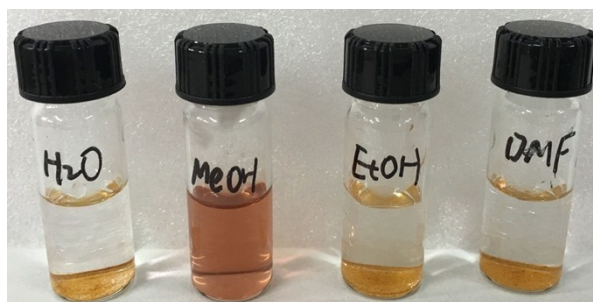

**Figure S8.** Freshly as-prepared crystals of **1** were respectively immersed in saturated H<sub>2</sub>O, MeOH, EtOH and DMF solutions of NaN<sub>3</sub> at room temperature.

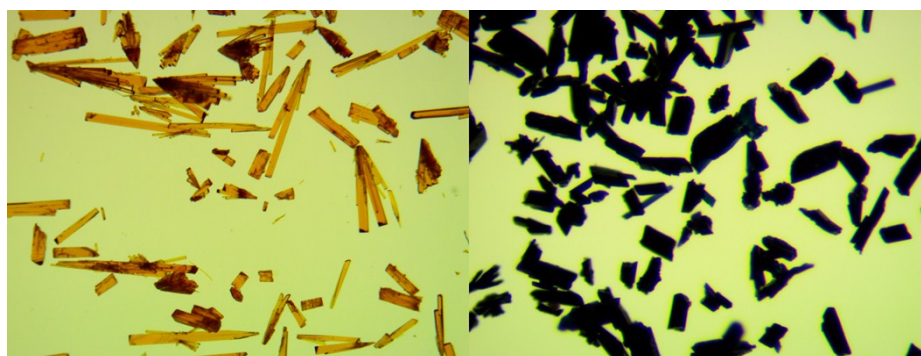

**Figure S9.** Optical microscopic photographs of **1** (left) and **2** (right).
